# Supplementary material for: Diversification of division mechanisms in endospore-forming bacteria revealed by analyses of peptidoglycan synthesis in Clostridioides difficile
Source: PubMed Central journal article supplement (PMC10693644; doi:10.1038/s41467-023-43595-3), 2023-12-02
Supplement: 41467_2023_43595_MOESM3_ESM.pdf [file 41467_2023_43595_MOESM3_ESM.pdf]

## **Description of Additional Supplementary Files:**

**Supplementary Data 1:** Genome accession numbers and coordinates corresponding to dcw clusters shown in Figure 1.

**Supplementary Data 2:** Accession numbers of the sequences and summary data used to infer the information presented in Fig. 1, Supplementary Fig. 1-2, and Supplementary Data 3.

**Supplementary Data 3:** Jaccard similarity coefficients between sets of organisms grouped according to presence/absence of dcw SEDS (spoVE/ftsW) and sporulation (spo0A & spoIIIE) genes.

**Supplementary Data 4:** *C. difficile* strains used in this study.

**Supplementary Data 5:** *E. coli* strains used in this study.

**Supplementary Data 6:** RT-qPCR primers used for gene expression analyses shown in Supplementary Fig. 6.
